# Supplementary material for: Power-free water pump based on a superhydrophobic surface: generation of a mushroom-like jet and anti-gravity long-distance transport
Source: Royal Society of Chemistry journal article supplement (doi:10.1039/c6ta04908g), 2016-01-01
Supplement: c6ta04908g7.pdf [file c6ta04908g7.pdf]

## Supporting Information

### ***Power-Free Water Pump Based on Superhydrophobic Surface: Generation of Mushroom-Like Jet and Anti-Gravity Long-Distance Transport***

*Shuai Huang<sup>1</sup>, Jinlong Song<sup>1\*</sup>, Yao Lu<sup>2</sup>, Cunjing Lv<sup>3</sup>, Huanxi Zheng<sup>1</sup>, Xin Liu<sup>1</sup>, Zhuji Jin<sup>1</sup>, Danyang Zhao<sup>1</sup>, Claire J. Carmalt<sup>2</sup>, Ivan P. Parkin<sup>2</sup>*

1 Key Laboratory for Precision and Non-Traditional Machining Technology of Ministry of Education, Dalian University of Technology, Dalian 116024, China

2 Materials Chemistry Research Centre, Department of Chemistry, University College London, 20 Gordon Street, London, WC1H 0AJ, UK

3 Center of Smart Interfaces, Technische Universität Darmstadt, Darmstadt 64287, Germany

\*Contact information: [songjinlong@dlut.edu.cn](mailto:songjinlong@dlut.edu.cn)

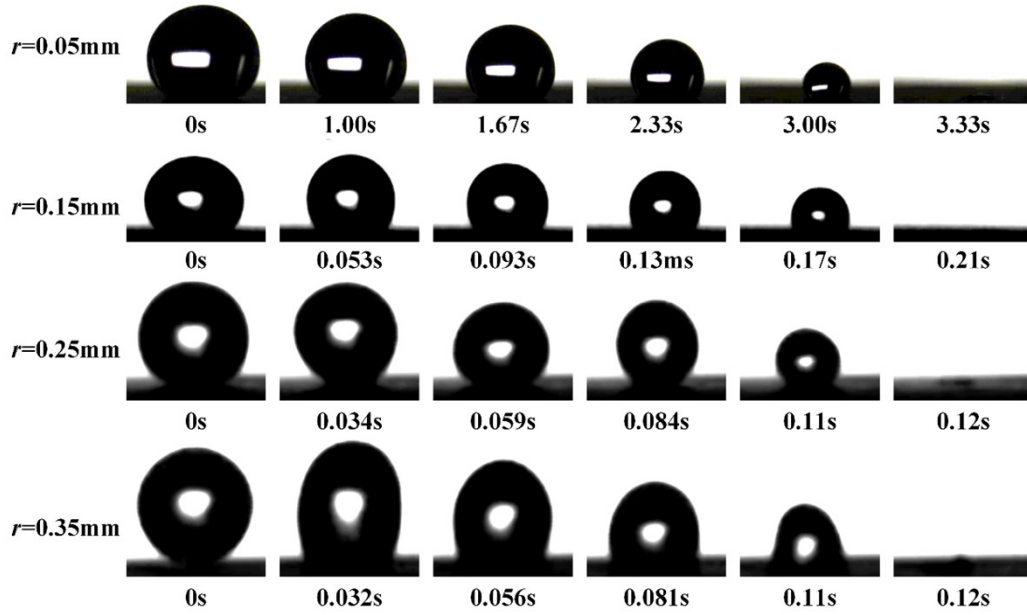

**Fig. S1** Variation of contact angles with time at different pores' diameter. The water droplet with an initial volume 5  $\mu\text{L}$  was in an instable state with a gradually reduced contact angle, which as a function of the time exhibited a similar trend. The self-capturing time was decreasing with the increasing pore's diameter.

**Table S1** The critical volume  $V_{\text{cri}}$  of water droplets on the superhydrophobic plate with different diameter of pore.  $V_{\text{cri}}$  refers to the critical volume when the contact line just reduced to the pore's diameter ( $R_{\text{cri}} = r / \sin \theta_0$ ), and the critical volume  $V_{\text{cri}}$  is given by Equation (S1).

| Pore's radius<br>$r / \text{mm}$ | Critical volume<br>$V_{\text{cri}} / \mu\text{L}$ | Critical radius<br>$R_{\text{cri}} / \text{mm}$ | Critical CA<br>$\theta_0 / ^\circ$ |
|----------------------------------|---------------------------------------------------|-------------------------------------------------|------------------------------------|
| 0.05                             | 0.01                                              | 0.13                                            | $158^\circ \pm 2^\circ$            |
| 0.15                             | 0.27                                              | 0.40                                            | $158^\circ \pm 2^\circ$            |
| 0.25                             | 1.25                                              | 0.67                                            | $158^\circ \pm 2^\circ$            |
| 0.35                             | 3.42                                              | 0.93                                            | $158^\circ \pm 2^\circ$            |

$$V_{\text{cri}} = \frac{1}{3} \pi \left( \frac{r}{\sin \theta_0} \right)^3 (2 - 3 \cos \theta_0 + \cos^3 \theta_0) \quad (\text{S1})$$

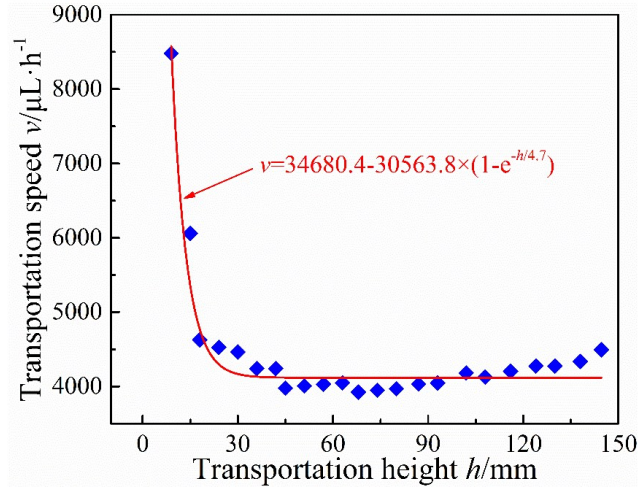

**Fig. S2** Transportation speed as a function of the transportation height. Results indicated that the increase of transportation height  $h$  resulted in a dramatic decreased and was followed by a decrease gradually because the driving pressure was changed. As shown in Fig.S3, the total driving pressure  $P_{\text{in}}$  can be calculated as Equation (S2).

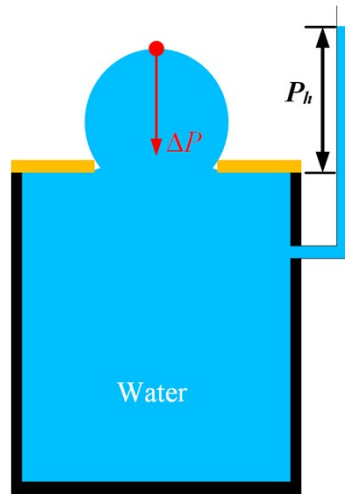

**Fig. S3** Pressure analysis in the transportation process

$$P_{\text{in}} = \Delta P - P_h \quad (\text{S2})$$

Where  $P_h = \rho gh$ , the increase of  $h$  resulted in an increased  $P_h$  and was followed by a decrease of  $P_{\text{in}}$ . The self-capturing time of water droplet increases with the

decreasing of driving force, resulting in a decreased transportation speed.

### **List of supplementary movies:**

**Movie S1:** Generation processes of the mushroom-like jets under different working conditions and wettabilities. (pore diameter, 0.1mm; droplet volume,  $\sim 6.4 \mu\text{L}$ ).

**Movie S2:** A time-lapsed video clip observed by a high-speed camera of the penetrating process of  $5 \mu\text{L}$  water droplets on the superhydrophobic plate under different pore diameter and playing speed ( $d=0.1 \text{ mm}$ ,  $\times 0.3$  speed;  $d=0.3 \text{ mm}$ ,  $\times 0.025$  speed;  $d=0.5 \text{ mm}$ ,  $\times 0.0083$  speed;  $d=0.7 \text{ mm}$ ,  $\times 0.0083$  speed;  $\Delta t$  is the capturing time).

**Movie S3:** Generation process of the multiple mushroom-like jets (pore diameter, 0.3mm; droplet volume,  $\sim 6.4 \mu\text{L}$ ).

**Movie S4:** The experiment process of measuring sliding angles on the superhydrophobic surface and ordinary surface.

**Movie S5:** The antigravity transport process of the water pump (pore diameter, 0.1 mm; tube diameter, 1 mm; transport height, 144.6 mm).

**Movie S6:** Long distance transport process of the water pump (pore diameter, 0.3 mm; tube length, 1 m; tube diameter, 1 mm).
